# Supplementary material for: Dynamic models of stress-smoking responses based on high-frequency sensor data
Source: PubMed Central journal article supplement (PMC8611062; doi:10.1038/s41746-021-00532-2), 2021-11-23
Supplement: 41746_2021_532_MOESM1_ESM.pdf [file 41746_2021_532_MOESM1_ESM.pdf]

Supplementary Table 1. Data information for all the participants.

| Participant ID | Original data samples (in minutes) | Data samples after interpolation (in minutes) | Number of original data chunks | Number of data chunks after discarding chunks with size < 5 | Data samples after discarding data with chunk size < 5 (in minutes) | Cluster |
|----------------|------------------------------------|-----------------------------------------------|--------------------------------|-------------------------------------------------------------|---------------------------------------------------------------------|---------|
| 201            | 529                                | 632                                           | 30                             | 20                                                          | 607                                                                 | 1       |
| 202            | 513                                | 642                                           | 63                             | 38                                                          | 591                                                                 | 1       |
| 203            | 650                                | 775                                           | 46                             | 22                                                          | 736                                                                 | 3       |
| 204            | 434                                | 554                                           | 65                             | 30                                                          | 473                                                                 | 2       |
| 205            | 706                                | 878                                           | 81                             | 40                                                          | 792                                                                 | 1       |
| 208            | 894                                | 1169                                          | 121                            | 64                                                          | 1057                                                                | 3       |
| 209            | 538                                | 625                                           | 38                             | 26                                                          | 601                                                                 | 1       |
| 210            | 79                                 | 90                                            | 3                              | 3                                                           | 90                                                                  | 4       |
| 211            | 953                                | 1182                                          | 85                             | 51                                                          | 1114                                                                | 1       |
| 212            | 911                                | 1076                                          | 89                             | 45                                                          | 989                                                                 | 1       |
| 213            | 782                                | 913                                           | 63                             | 33                                                          | 860                                                                 | 2       |
| 214            | 768                                | 976                                           | 113                            | 50                                                          | 851                                                                 | 2       |
| 215            | 1176                               | 1380                                          | 51                             | 31                                                          | 1346                                                                | 1       |
| 216            | 706                                | 889                                           | 62                             | 40                                                          | 846                                                                 | 5       |
| 217            | 852                                | 1043                                          | 90                             | 48                                                          | 957                                                                 | 4       |
| 219            | 766                                | 933                                           | 55                             | 37                                                          | 898                                                                 | 2       |
| 220            | 553                                | 673                                           | 66                             | 33                                                          | 598                                                                 | 5       |
| 222            | 625                                | 770                                           | 89                             | 47                                                          | 699                                                                 | 4       |
| 226            | 1014                               | 1253                                          | 101                            | 67                                                          | 1186                                                                | 3       |
| 228            | 843                                | 1063                                          | 90                             | 50                                                          | 992                                                                 | 2       |
| 229            | 1452                               | 1776                                          | 90                             | 60                                                          | 1716                                                                | 2       |
| 230            | 1077                               | 1329                                          | 112                            | 60                                                          | 1237                                                                | 4       |
| 231            | 1132                               | 1402                                          | 148                            | 80                                                          | 1280                                                                | 4       |
| 233            | 803                                | 992                                           | 98                             | 51                                                          | 909                                                                 | 4       |
| 234            | 392                                | 550                                           | 69                             | 39                                                          | 496                                                                 | 4       |
| 235            | 802                                | 995                                           | 75                             | 36                                                          | 916                                                                 | 5       |
| 240            | 766                                | 960                                           | 120                            | 58                                                          | 842                                                                 | 1       |
| 242            | 318                                | 458                                           | 94                             | 37                                                          | 355                                                                 | 2       |
| 244            | 356                                | 433                                           | 36                             | 19                                                          | 399                                                                 | 4       |
| 245            | 500                                | 620                                           | 74                             | 29                                                          | 538                                                                 | 4       |
| 250            | 1169                               | 1401                                          | 85                             | 52                                                          | 1345                                                                | 4       |
| 251            | 1129                               | 1336                                          | 95                             | 52                                                          | 1250                                                                | 2       |
| 252            | 1221                               | 1459                                          | 96                             | 51                                                          | 1365                                                                | 5       |
| 253            | 1180                               | 1408                                          | 78                             | 56                                                          | 1366                                                                | 4       |
| 255            | 611                                | 789                                           | 99                             | 47                                                          | 688                                                                 | 1       |
| 257            | 351                                | 420                                           | 12                             | 10                                                          | 412                                                                 | 1       |
| 258            | 194                                | 236                                           | 22                             | 14                                                          | 221                                                                 | 1       |
| 259            | 310                                | 365                                           | 31                             | 17                                                          | 340                                                                 | 2       |
| 260            | 511                                | 629                                           | 64                             | 35                                                          | 582                                                                 | 2       |
| 261            | 918                                | 1103                                          | 56                             | 37                                                          | 1067                                                                | 3       |
| 262            | 823                                | 1023                                          | 111                            | 60                                                          | 914                                                                 | 1       |
| 264            | 377                                | 529                                           | 150                            | 40                                                          | 335                                                                 | 4       |
| 265            | 1152                               | 1353                                          | 88                             | 55                                                          | 1293                                                                | 5       |
| 268            | 590                                | 717                                           | 97                             | 40                                                          | 602                                                                 | 3       |
| 270            | 115                                | 157                                           | 26                             | 14                                                          | 143                                                                 | 4       |

Supplementary Table 2. Statistics of data used in this study.

| Data Characteristic                                                 | Mean   | Standard Deviation | Median | Minimum | Maximum |
|---------------------------------------------------------------------|--------|--------------------|--------|---------|---------|
| Original data samples (in minutes)                                  | 723.13 | 323.57             | 766    | 79      | 1452    |
| Data samples after interpolation (in minutes)                       | 887.91 | 385.48             | 913    | 90      | 1776    |
| Number of original data chunks                                      | 76.15  | 33.12              | 81     | 3       | 150     |
| Number of data chunks after discarding chunks with size < 5         | 40.53  | 16.46              | 40     | 3       | 80      |
| Data samples after discarding data with chunk size < 5 (in minutes) | 819.86 | 375.81             | 846    | 90      | 1716    |
